# Supplementary material for: Coupling hierarchical iron cobalt selenide arrays with N-doped carbon as advanced anodes for sodium ion storage
Source: Royal Society of Chemistry journal article supplement (doi:10.1039/d1ta00226k), 2021-01-01
Supplement: d1ta00226k1.pdf [file d1ta00226k1.pdf]

**Supporting Information for**

**Coupling Hierarchical Iron Cobalt Selenide Arrays with**

**N-doped Carbon as Advanced Anodes for Sodium Ion Storage**

Peijia Wang,<sup>a</sup> Jiajie Huang,<sup>a</sup> Jing Zhang,<sup>a</sup> Liang Wang,<sup>a</sup> Peiheng Sun,<sup>a</sup> Yefeng Yang,<sup>\*a, b</sup>  
and Zhujun Yao<sup>\*a</sup>

<sup>a</sup>*School of Materials Science and Engineering, Zhejiang Sci-Tech University, Hangzhou 310018, China.*

<sup>b</sup>*MOE Key Laboratory of Advanced Textile Materials and Manufacturing Technology, Zhejiang Sci-Tech University, Hangzhou 310018, China.*

Email address: [yangyf@zstu.edu.cn](mailto:yangyf@zstu.edu.cn) (Dr. Y. Yang), [yaozj@zstu.edu.cn](mailto:yaozj@zstu.edu.cn) (Dr. Z. Yao)

Tel: +86-571-8684 5569

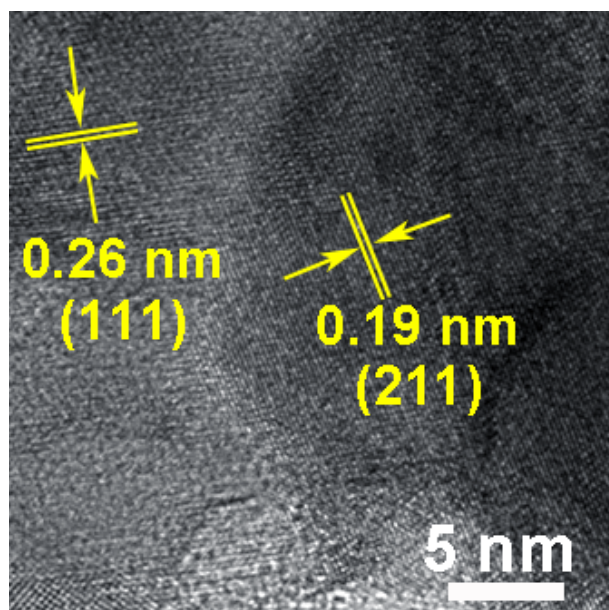

**Fig. S1.** HRTEM image of FeCo-Se anode in the core region.

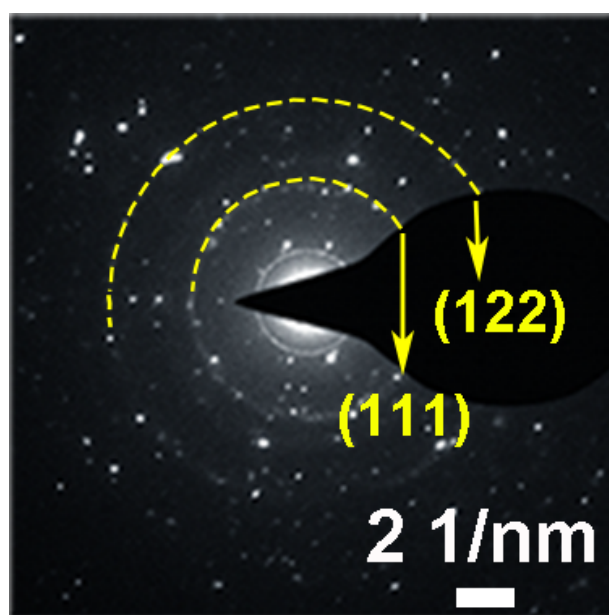

**Fig. S2.** Typical SAED pattern of FeCo-Se anode.

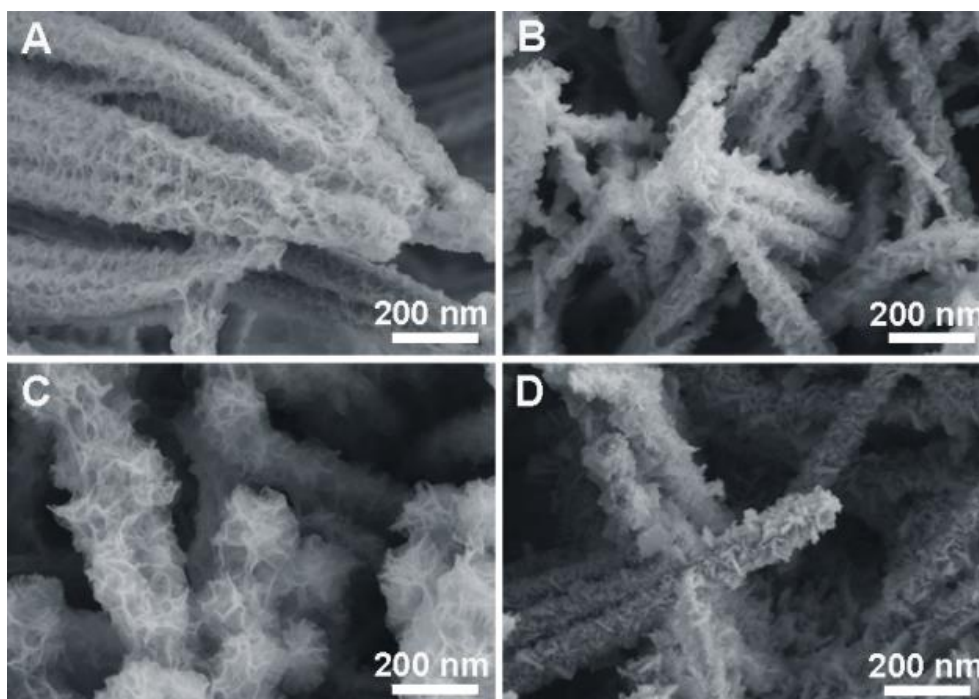

**Fig. S3.** SEM images of (A) Co-Se, (B) FeCo-Se-1.5, (C) FeCo-Se-2, and (D) FeCo-Se-3.

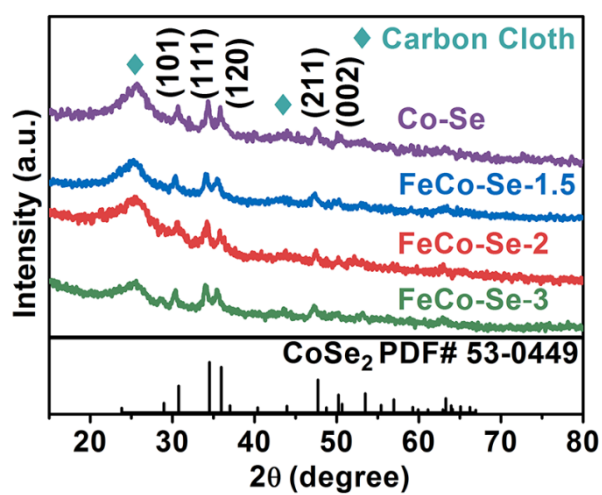

**Fig. S4.** XRD patterns of Co-Se, FeCo-Se-1.5, FeCo-Se-2, and FeCo-Se-3.

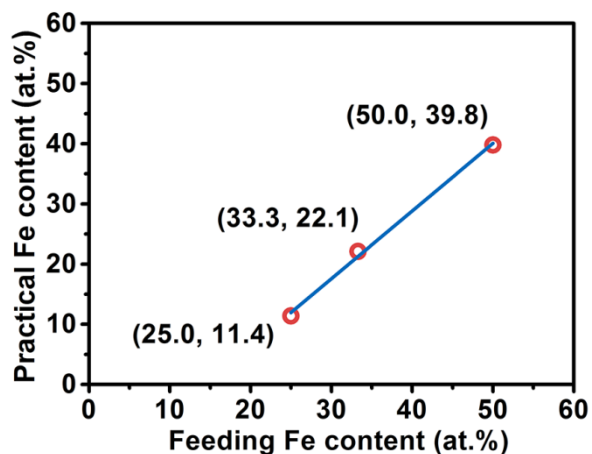

**Fig. S5.** The linear relationship between the practical Fe contents of (Fe/Fe+Co) in products and the feeding Fe contents in the starting materials for the samples.

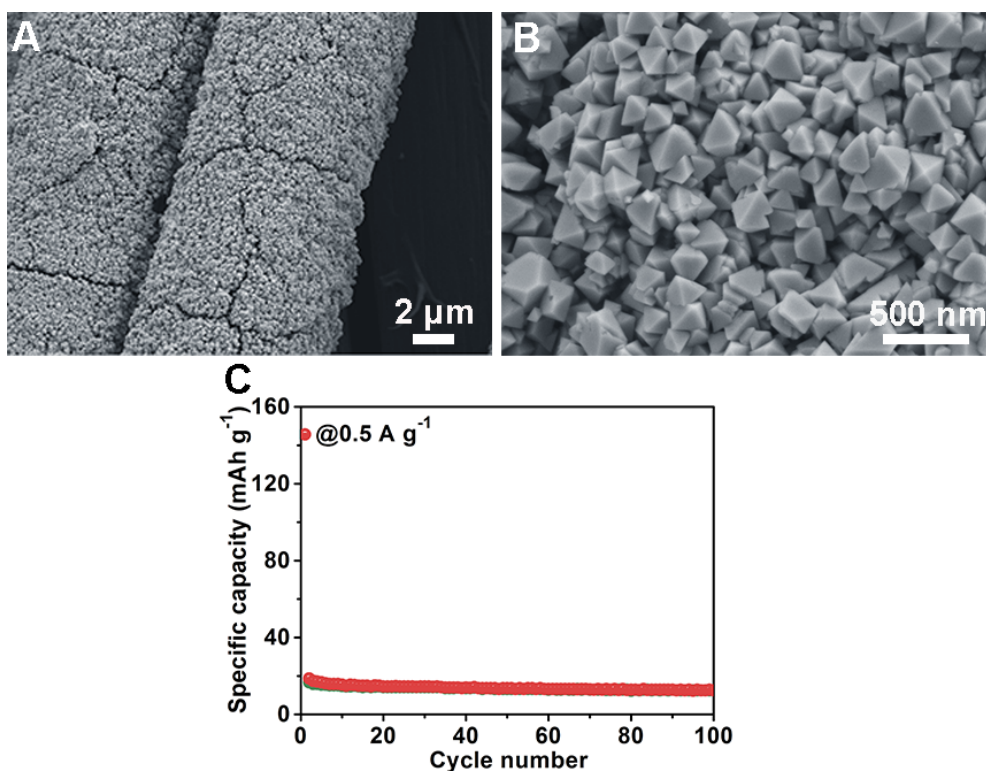

**Fig. S6.** (A, B) Typical low- and high-magnification SEM images of the iron selenide arrays, and (C) cycling stability of the iron selenide electrode tested at  $0.5 \text{ A g}^{-1}$ .

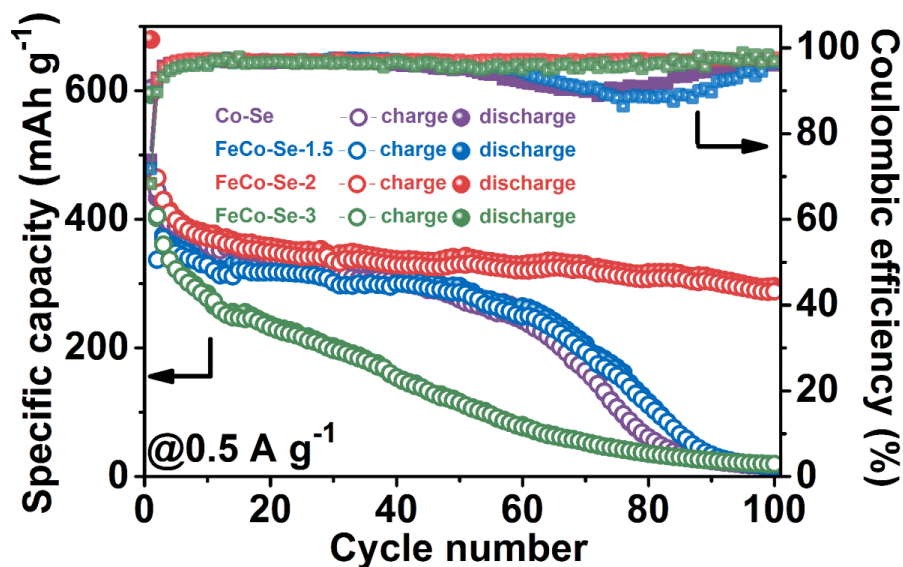

**Fig. S7.** The cycling performances of the Co-Se, FeCo-Se-1.5, FeCo-Se-2, and FeCo-Se-3 tested at  $0.5 \text{ A g}^{-1}$ .

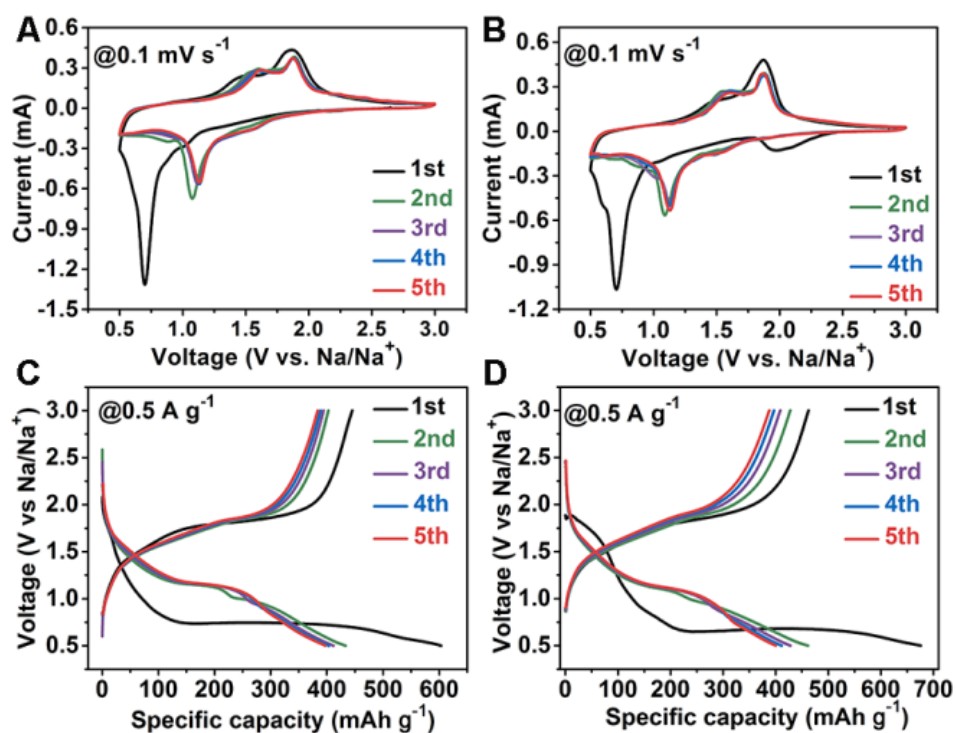

**Fig. S8.** CV curves of (A) Co-Se and (B) FeCo-Se anodes at a scan rate of  $0.1 \text{ mV s}^{-1}$ , and first five discharge–charge curves of (C) Co-Se and (D) FeCo-Se anodes at  $0.5 \text{ A g}^{-1}$ .

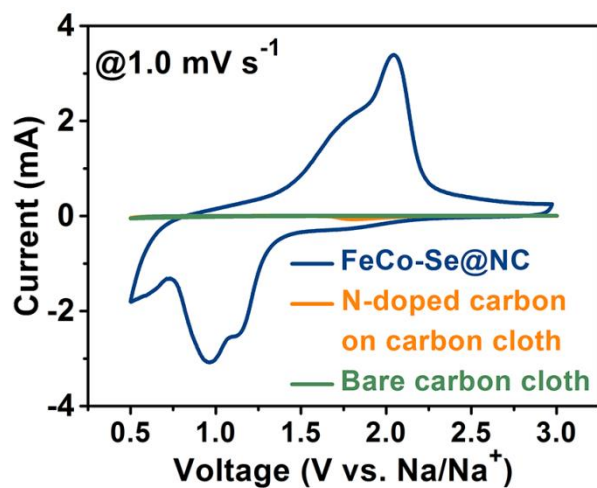

**Fig. S9.** Comparative CV curves for the FeCo-Se@NC, N-doped carbon on carbon cloth and bare carbon cloth tested at a scan rate of 1.0 mV s<sup>-1</sup>.

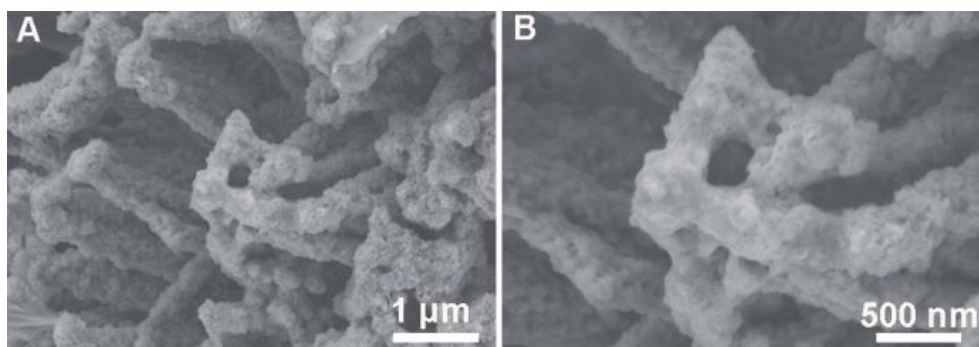

**Fig. S10.** (A) Low- and (B) high-magnification SEM images of the FeCo-Se@NC electrode after cycling.



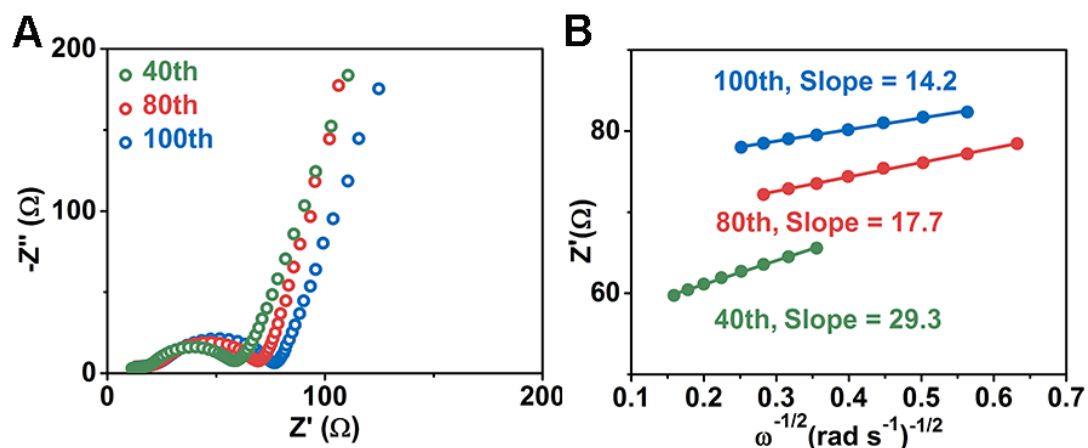

**Fig. S11.** (A) EIS spectra of the FeCo-Se@NC electrode after different cycles measured at discharged state of 0.5 V, and (B) the corresponding relationship of  $Z'$  versus  $\omega^{-1/2}$ .

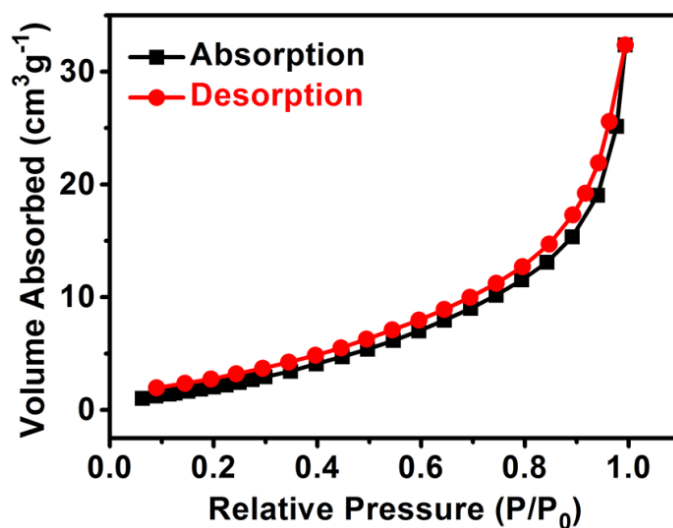

**Fig. S12.** N<sub>2</sub> adsorption-desorption isotherms of the FeCo-Se@NC sample tested at 77 K for the evaluation of specific surface area.

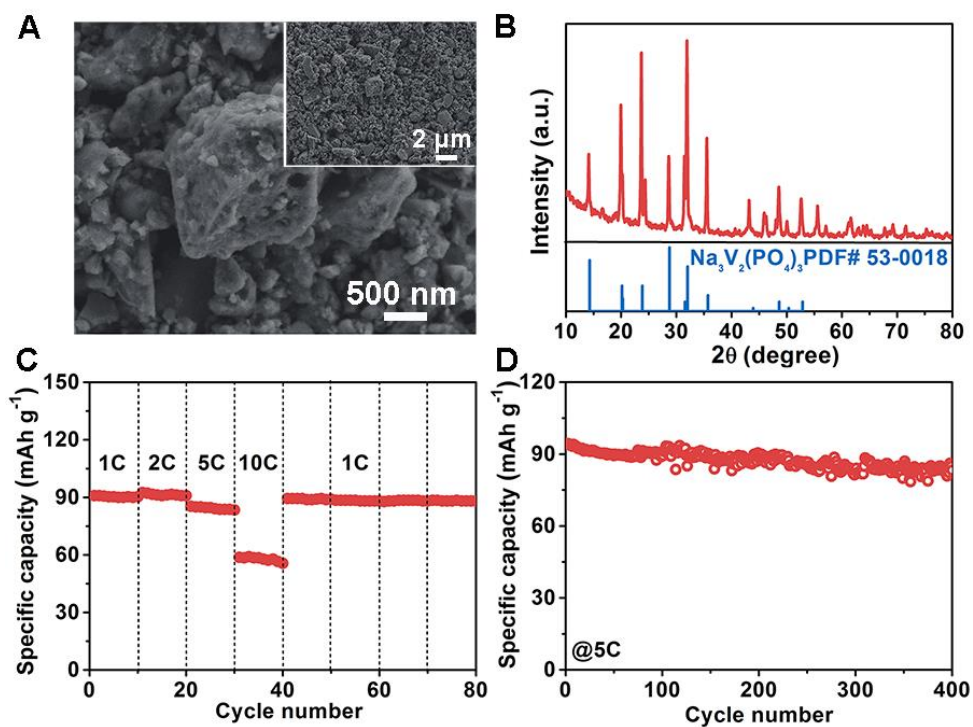

**Fig. S13.** (A) SEM image of  $\text{Na}_3\text{V}_2(\text{PO}_4)_3/\text{C}$  cathode, (B) XRD pattern of  $\text{Na}_3\text{V}_2(\text{PO}_4)_3/\text{C}$  cathode, (C) rate capability and (D) cycling stability of the  $\text{Na}_3\text{V}_2(\text{PO}_4)_3/\text{C}$  cathode (1C =  $0.374 \text{ A g}^{-1}$ ).

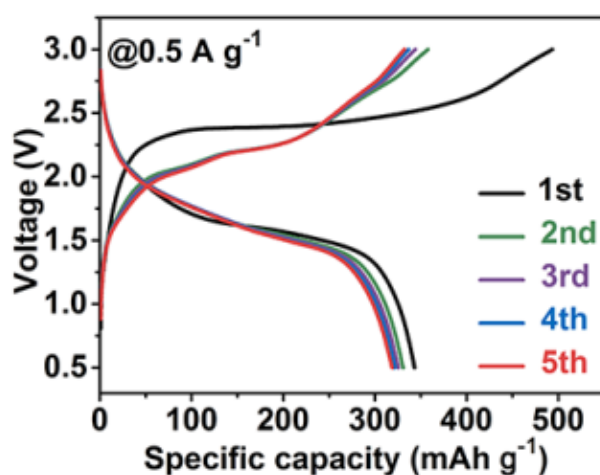

**Fig. S14.** First five charge-discharge curves of the full cell tested at  $0.5 \text{ A g}^{-1}$  without presodiation.
